# Supplementary material
Source: MDPI journal article supplement (https://www.mdpi.com/1099-4300/11/4/606)
Supplement: s1 [file s1]

Correction

## Misleading Reference

Peter Harremoës, Editor-in-Chief

Copenhagen Business College, Copenhagen, Denmark; E-Mail: entropeter@mdpi.org

Received: 17 May 2010 / Published: 27 May 2010

---

We just became aware that the article [1] published in Entropy 2009 contains a *false reference*. From the list of references in [1] one gets the impression that the manuscript [2] has been *accepted* for publication in the journal Biophysical Chemistry. We have contacted the editors of that journal and they could tell us that [2] is a *rejected* manuscript, which is also the reason why the manuscript does not appear on the journal's homepage. Following the editorial policy of Entropy we do not make any changes in an already published paper, so we have to bring this correction instead.

### References

1. Annala, A.; Salthe, S. Economies evolve by energy dispersal. *Entropy* **2009**, *11*, 606-633.
2. Jaakkola, S.; El-Showk, S.; Annala, A. The driving force behind genomic diversity. arXiv:0807.0892.

© 2010 by the author; licensee MDPI, Basel, Switzerland. This article is an Open Access article distributed under the terms and conditions of the Creative Commons Attribution license <http://creativecommons.org/licenses/by/3.0/>.
